# Supplementary material for: Probabilistic assessment of field-scale CO 2 generation byCarbonate/Clay Reactions in sedimentary basins
Source: Copernicus journal article supplement (doi:10.5194/hess-2020-525), 2020-11-12
Supplement: Supplementary file 1 [file hess-2020-525-supplement.pdf]

Supplementary Materials

of

Field scale probabilistic assessment of CO<sub>2</sub> generation by Carbonate/Clay Reactions in sedimentary basins.

Authors: Ceriotti G.<sup>a</sup>; Geloni C.<sup>b</sup>; Dalla Rosa M.<sup>b</sup>; Guadagnini A.<sup>a</sup> & Porta G. M.<sup>a</sup>

<sup>a</sup> Department of Civil and Environmental Engineering, Politecnico di Milano, Piazza L. Da Vinci 32, 20133 Milano, Italy

<sup>b</sup> Eni S.p.A.-Upstream and Technical Services, via Emilia, 1 20097 San Donato Milanese (MI), Italy

| Phase            | $\mu_A$    | $\mu_D$   | $\psi(1,1)$ | $\psi(2,2)$ | $\psi(1,2) = \psi(2,1)$ |
|------------------|------------|-----------|-------------|-------------|-------------------------|
| Dolomite         | -1781.4513 | 647.14323 | 0.0104      | 0.0017      | -0.0042                 |
| Kaolinite        | -982.6440  | 353.0673  | 13.1892     | 1.9185      | -5.0267                 |
| Quartz           | -19.987746 | 6.8807392 | 0           | 0           | 0                       |
| CO <sub>2</sub>  | -593.13177 | 212.78902 | 13.1892     | 1.9185      | -5.0267                 |
| H <sub>2</sub> O | -23.214004 | 5.9253394 | 0           | 0           | 0                       |
| Clinochlore      | -2858.9199 | 1029.1247 | 13.1892     | 1.9185      | -5.0267                 |
| Calcite          | -851.1478  | 310.0792  | 0.0104      | 0.0017      | -0.0042                 |
| Microcline       | -639.62283 | 231.07535 | 13.1892     | 1.9185      | -5.0267                 |
| Beidellite       | -1235.8761 | 441.95034 | 13.1892     | 1.9185      | -5.0267                 |
| Illite           | -1339.8366 | 480.08976 | 13.1892     | 1.9185      | -5.0267                 |
| Albite           | -689.96847 | 249.38627 | 13.1892     | 1.9185      | -5.0267                 |
| Analcime         | -701.77143 | 252.2284  | 13.1892     | 1.9185      | -5.0267                 |

**Table S 1:** Characterization of means ( $\mu_A$  and  $\mu_D$ ) and the entries of the covariance matrix ( $\psi$ ) of the bivariate Gaussian random variables  $\tilde{A}$  and  $\tilde{D}$  for all phases included in CCR1, CCR2 and CCR3: calcite, kaolinite, dolomite, CO<sub>2</sub>, H<sub>2</sub>O, clinochlore, microcline, beidellite, illite, albite, analcime.

| Phase            | $B$                          | $C$                     | $E$                      |
|------------------|------------------------------|-------------------------|--------------------------|
| Dolomite         | $-2.8852827 \times 10^{-1}$  | $9.9264201 \times 10^4$ | $-5.5534198 \times 10^6$ |
| Kaolinite        | $-1.6227654 \times 10^{-1}$  | $5.7278099 \times 10^4$ | $-2.5386392 \times 10^6$ |
| Quartz           | $-2.1688586 \times 10^{-3}$  | $5.5357231 \times 10^2$ | $-8.4503401 \times 10^4$ |
| CO <sub>2</sub>  | $-9.6074033E \times 10^{-2}$ | $3.2546625 \times 10^4$ | $-1.9324505 \times 10^6$ |
| H <sub>2</sub> O | $-4.7007808 \times 10^{-4}$  | $3.0569427 \times 10^3$ | $-4.880326 \times 10^3$  |
| Clinochlore      | $-4.4322807 \times 10^{-1}$  | $1.7663305 \times 10^5$ | $-7.6602963 \times 10^6$ |
| Calcite          | $-1.3947146 \times 10^{-1}$  | $4.6881027 \times 10^4$ | $-2.6591521 \times 10^6$ |
| Microcline       | $-1.0356825 \times 10^{-1}$  | $3.522897 \times 10^4$  | $-1.723989 \times 10^6$  |
| Beidellite       | $-1.9667428 \times 10^{-1}$  | $7.2285809 \times 10^4$ | $-3.392105 \times 10^6$  |
| Illite           | $-2.127979 \times 10^{-1}$   | $7.9520722 \times 10^4$ | $-3.7078528 \times 10^6$ |
| Albite           | $-1.1425341 \times 10^{-1}$  | $3.8942781 \times 10^4$ | $-1.8606376 \times 10^6$ |
| Analcime         | $-1.0854141 \times 10^{-1}$  | $4.1184756 \times 10^4$ | $-1.909524 \times 10^6$  |

**Table S 2:** Deterministic values of  $B$ ,  $C$  and  $E$  parameters for all phases included in CCR1, CCR2 and CCR3: calcite, kaolinite, dolomite, CO<sub>2</sub>, H<sub>2</sub>O, clinochlore, microcline, beidellite, illite, albite, analcime.
